# Supplementary material for: Additives in protic–hydridic hydrogen storage compounds: a molecular study
Source: Royal Society of Chemistry journal article supplement (doi:10.1039/c4ra09778e), 2014-01-01
Supplement: c4ra09778e1.pdf [file c4ra09778e1.pdf]

## **Additives in Protic-Hydridic Hydrogen Storage Compounds: A Molecular Study**

Indrani Choudhuri,<sup>†</sup> Arup Mahata,<sup>†</sup> Biswarup Pathak,<sup>\*†</sup>

<sup>†</sup>Discipline of Chemistry, School of Basic Sciences, Indian Institute of Technology (IIT) Indore, Khandwa Road, Indore 452017 (M.P.), India

Frisch, M. J.; et al. Gaussian 09 , Revision B.1; Gaussian: Wallingford, CT, USA, 2009.

Table (S6) : Atomic Hydrogen liberation Energy of all the steps (Units in eV/Mol)

| Compound                                                                                                                                                          | 1 <sup>st</sup> step                                                                                                                                 | 2 <sup>nd</sup> step                                                                                                | 3 <sup>rd</sup> step                                                                                        | 4 <sup>th</sup> step                                                           | 5 <sup>th</sup> step                    | 6 <sup>th</sup> step | 7 <sup>th</sup> step | 8 <sup>th</sup> step | 9 <sup>th</sup> step | 10 <sup>th</sup> step |
|-------------------------------------------------------------------------------------------------------------------------------------------------------------------|------------------------------------------------------------------------------------------------------------------------------------------------------|---------------------------------------------------------------------------------------------------------------------|-------------------------------------------------------------------------------------------------------------|--------------------------------------------------------------------------------|-----------------------------------------|----------------------|----------------------|----------------------|----------------------|-----------------------|
| NH <sub>3</sub><br>(-H <sub>N</sub> =4.92)<br>NH <sub>2</sub>                                                                                                     | NH <sub>2</sub><br>(-H <sub>N</sub> =6.46)<br>NH                                                                                                     | NH<br>(-H <sub>N</sub> =4.34)<br>N                                                                                  |                                                                                                             |                                                                                |                                         |                      |                      |                      |                      |                       |
| BH <sub>3</sub><br>(-H <sub>B</sub> =4.80)<br>BH <sub>2</sub>                                                                                                     | BH <sub>2</sub><br>(-H <sub>B</sub> =3.94)<br>BH                                                                                                     | BH<br>(-H <sub>N</sub> =3.61)<br>B                                                                                  |                                                                                                             |                                                                                |                                         |                      |                      |                      |                      |                       |
| LiNH <sub>2</sub><br>(-H <sub>N</sub> =4.92)<br>LiNH                                                                                                              | LiNH<br>(-H <sub>N</sub> =6.45)<br>LiN                                                                                                               |                                                                                                                     |                                                                                                             |                                                                                |                                         |                      |                      |                      |                      |                       |
| LiBH <sub>2</sub><br>(-H <sub>B</sub> =4.21)<br>LiBH                                                                                                              | LiBH<br>(-H <sub>N</sub> =4.76)<br>LiB                                                                                                               |                                                                                                                     |                                                                                                             |                                                                                |                                         |                      |                      |                      |                      |                       |
| NH <sub>3</sub> BH <sub>3</sub><br>(-H <sub>N</sub> =4.92)<br>1) NH <sub>2</sub> BH <sub>3</sub><br>(-H <sub>B</sub> =4.68)<br>2) NH <sub>3</sub> BH <sub>2</sub> | NH <sub>3</sub> BH <sub>2</sub><br>(-H <sub>N</sub> =2.03)<br>1) NH <sub>2</sub> BH <sub>2</sub><br>(-H <sub>B</sub> =4.68)<br>2) NH <sub>3</sub> BH | NH <sub>2</sub> BH <sub>2</sub><br>(-H <sub>B</sub> =4.81)<br>1)<br>(-H <sub>N</sub> =5.47)<br>2) NHBH <sub>2</sub> | NH <sub>2</sub> BH<br>(-H <sub>N</sub> =2.99)<br>1) NHBH<br>(-H <sub>B</sub> =3.40)<br>2) NH <sub>2</sub> B | NHBH<br>(-H <sub>B</sub> =5.10)<br>1) BNH<br>(-H <sub>N</sub> =5.96)<br>2) NBH | BNH<br>(-H <sub>N</sub> =6.42)<br>1) BN |                      |                      |                      |                      |                       |
| LiNH <sub>2</sub> BH <sub>3</sub><br>(-H <sub>B</sub> =4.50)<br>1) LiNH <sub>2</sub> BH <sub>2</sub>                                                              | LiNH <sub>2</sub> BH <sub>2</sub><br>(-H <sub>N</sub> =2.65)<br>1) LiNHBH <sub>2</sub>                                                               | LiNHBH <sub>2</sub><br>(-H <sub>B</sub> =4.52)<br>1) LiNHBH                                                         | LiNHBH<br>(-H <sub>N</sub> =2.64)<br>1) LiNBH                                                               | LiNBH<br>(-H <sub>N</sub> =4.98)<br>LiNB                                       |                                         |                      |                      |                      |                      |                       |

|                                                                                                                                                                                                                                     |                                                                                                                                                                                                    |                                                                                                                                                                        |                                                                                                                                           |                                                                                                                                        |                                                                          |                                                             |                                     |  |  |
|-------------------------------------------------------------------------------------------------------------------------------------------------------------------------------------------------------------------------------------|----------------------------------------------------------------------------------------------------------------------------------------------------------------------------------------------------|------------------------------------------------------------------------------------------------------------------------------------------------------------------------|-------------------------------------------------------------------------------------------------------------------------------------------|----------------------------------------------------------------------------------------------------------------------------------------|--------------------------------------------------------------------------|-------------------------------------------------------------|-------------------------------------|--|--|
| (-H <sub>N</sub> =4.89)<br>2) LiNHBH <sub>3</sub>                                                                                                                                                                                   | (-H <sub>N</sub> =4.59)<br>2) LiNH <sub>2</sub> BH                                                                                                                                                 | (-H <sub>N</sub> =4.89)<br>2)LiNBH <sub>2</sub>                                                                                                                        | (-H <sub>B</sub> =3.30)<br>2)LiBNH                                                                                                        |                                                                                                                                        |                                                                          |                                                             |                                     |  |  |
| LiBH <sub>2</sub> NH <sub>3</sub><br>(-H <sub>N</sub> =2.58)<br>1) LiBH <sub>2</sub> NH <sub>2</sub><br><br>(-H <sub>B</sub> =4.30)<br>2) LiBHNH <sub>3</sub>                                                                       |                                                                                                                                                                                                    |                                                                                                                                                                        |                                                                                                                                           |                                                                                                                                        |                                                                          |                                                             |                                     |  |  |
| LiNH <sub>2</sub> NH <sub>3</sub><br>(-H <sub>N2</sub> =4.66)<br>1) LiNH <sub>2</sub> NH <sub>2</sub><br><br>(-H <sub>N1</sub> =4.88)<br>2) LiNHNH <sub>3</sub>                                                                     | LiNH <sub>2</sub> NH <sub>2</sub><br>(-H <sub>N1</sub> =6.23)<br>1) LiNHNH <sub>2</sub>                                                                                                            | LiNHNH <sub>2</sub><br>(-H <sub>N2</sub> =3.66)<br>1) LiNHNH                                                                                                           | LiNHNH<br>(-H <sub>N1</sub> =3.39)<br>1)LiNHNH                                                                                            | LiNNH<br>(-H <sub>N2</sub> = 2.22)<br>1)LiNN                                                                                           |                                                                          |                                                             |                                     |  |  |
| LiNH <sub>2</sub> BH <sub>3</sub> .NH <sub>3</sub><br>(-H <sub>B</sub> =4.49)<br>LiNH <sub>2</sub> BH <sub>2</sub> .NH <sub>3</sub><br>(-H <sub>N1</sub> =5.50)<br>LiNHBH <sub>3</sub> .NH <sub>3</sub><br>(-H <sub>N2</sub> =6.14) | LiNH <sub>2</sub> BH <sub>2</sub> .NH <sub>3</sub><br>(-H <sub>N1</sub> =2.63)<br>1) LiNHBH <sub>2</sub> .NH <sub>3</sub><br><br>(-H <sub>B</sub> =4.47)<br>2) LiNH <sub>2</sub> BHNH <sub>3</sub> | LiNHBH <sub>2</sub> .NH <sub>3</sub><br>(-H <sub>B</sub> =4.52)<br>1) LiNHBH.NH <sub>3</sub><br><br>(-H <sub>N1</sub> =5.19)<br>2)LiNHBH <sub>2</sub> .NH <sub>2</sub> | LiNHBH.NH <sub>3</sub><br>(-H <sub>N2</sub> =2.57)<br>1) LiNBH.NH <sub>3</sub><br><br>(-H <sub>B</sub> =2.92)<br>2) LiBNH.NH <sub>3</sub> | LiNBH.NH <sub>3</sub><br>(-H <sub>B</sub> =4.97)<br>1) LiNB.NH <sub>3</sub><br><br>(-H <sub>N2</sub> =5.15)<br>2)LiNBH.NH <sub>2</sub> | LiNB.NH <sub>3</sub><br>(-H <sub>N2</sub> =6.51)<br>LiNB.NH <sub>2</sub> | LiNB.NH <sub>2</sub><br>(-H <sub>N2</sub> =3.81)<br>LiNB.NH | LiNB.NH<br>(-H <sub>N2</sub> =4.24) |  |  |

|                                                                                                                                                                                                                                                                                           |                                                                                                                                                                                                                                                                                          |                                                                                                                                                                                                                                    |                                                                                                                                                                                                       |                                                                                                                                        |                                                                          |                                                             |                                     |  |  |  |
|-------------------------------------------------------------------------------------------------------------------------------------------------------------------------------------------------------------------------------------------------------------------------------------------|------------------------------------------------------------------------------------------------------------------------------------------------------------------------------------------------------------------------------------------------------------------------------------------|------------------------------------------------------------------------------------------------------------------------------------------------------------------------------------------------------------------------------------|-------------------------------------------------------------------------------------------------------------------------------------------------------------------------------------------------------|----------------------------------------------------------------------------------------------------------------------------------------|--------------------------------------------------------------------------|-------------------------------------------------------------|-------------------------------------|--|--|--|
| LiNH <sub>2</sub> BH <sub>3</sub> .NH <sub>2</sub>                                                                                                                                                                                                                                        | (-H <sub>N2</sub> =3.18)<br>LiNH <sub>2</sub> BH <sub>2</sub> .NH <sub>2</sub>                                                                                                                                                                                                           | (-H <sub>N2</sub> =4.80)<br>3) LiNBH.NH <sub>3</sub>                                                                                                                                                                               | (-H <sub>N1</sub> =4.48)<br>3)LiNHBH.NH <sub>2</sub>                                                                                                                                                  |                                                                                                                                        |                                                                          |                                                             |                                     |  |  |  |
| LiNH <sub>2</sub> BH <sub>3</sub> .NH <sub>3</sub><br>(-H <sub>B</sub> =4.49)<br>LiNH <sub>2</sub> BH <sub>2</sub> .NH <sub>3</sub><br>(-H <sub>N1</sub> =5.50)<br>LiNHBH <sub>3</sub> .NH <sub>3</sub><br>(-H <sub>N2</sub> =6.14)<br>LiNH <sub>2</sub> BH <sub>3</sub> .NH <sub>2</sub> | LiNH <sub>2</sub> BH <sub>2</sub> .NH <sub>3</sub><br>(-H <sub>N1</sub> =2.63)<br>1) LiNHBH <sub>2</sub> .NH <sub>3</sub><br><br>(-H <sub>B</sub> =4.47)<br>2) LiNH <sub>2</sub> BHNH <sub>3</sub><br><br>(-H <sub>N2</sub> =3.18)<br>LiNH <sub>2</sub> BH <sub>2</sub> .NH <sub>2</sub> | LiNHBH <sub>2</sub> .NH <sub>3</sub><br>(-H <sub>B</sub> =4.52)<br>1) LiNHBH.NH <sub>3</sub><br><br>(-H <sub>N1</sub> =5.19)<br>2)LiNHBH <sub>2</sub> .NH <sub>2</sub><br><br>(-H <sub>N2</sub> =4.80)<br>3) LiNBH.NH <sub>3</sub> | LiNHBH.NH <sub>3</sub><br>(-H <sub>N2</sub> =2.57)<br>1) LiNBH.NH <sub>3</sub><br><br>(-H <sub>B</sub> =2.92)<br>2) LiBNH.NH <sub>3</sub><br><br>(-H <sub>N1</sub> =4.48)<br>3)LiNHBH.NH <sub>2</sub> | LiNBH.NH <sub>3</sub><br>(-H <sub>B</sub> =4.97)<br>1) LiNB.NH <sub>3</sub><br><br>(-H <sub>N2</sub> =5.15)<br>2)LiNBH.NH <sub>2</sub> | LiNB.NH <sub>3</sub><br>(-H <sub>N2</sub> =6.51)<br>LiNB.NH <sub>2</sub> | LiNB.NH <sub>2</sub><br>(-H <sub>N2</sub> =3.81)<br>LiNB.NH | LiNB.NH<br>(-H <sub>N2</sub> =4.24) |  |  |  |
| LiBH <sub>2</sub> BH <sub>3</sub><br>(-H <sub>B</sub> =3.68) (bridged H)<br>1)LiBH <sub>2</sub> BH <sub>2</sub><br>(-H <sub>B1</sub> =4.53)<br>2)LiBHBH <sub>3</sub>                                                                                                                      | LiBH <sub>2</sub> BH <sub>2</sub><br>(-H <sub>B1</sub> =5.24)<br>1) LiBHBH <sub>2</sub><br><br>(-H <sub>B1</sub> =5.12)                                                                                                                                                                  | LiBH <sub>2</sub> BH<br>(-H <sub>B1</sub> =4.19)<br>1)LiBHBH<br><br>(-H <sub>B2</sub> =4.76)                                                                                                                                       | LiBHBH<br>(-H <sub>B</sub> =5.83)<br>LiBBH                                                                                                                                                            | LiBBH<br>(-H <sub>B2</sub> =5.30)<br>LiBB                                                                                              |                                                                          |                                                             |                                     |  |  |  |

|                                                                                                                                                                                                                                                                            |                                                                                                                                                                                                                                                          |                                                                                                                                                                                                                                                                        |                                                                                                                                                                                                                                  |                                                                                                                                                                                  |                                                                                                                                            |                                                                                                                                 |                                                                                                     |                                                                                     |                                                                |                                                 |
|----------------------------------------------------------------------------------------------------------------------------------------------------------------------------------------------------------------------------------------------------------------------------|----------------------------------------------------------------------------------------------------------------------------------------------------------------------------------------------------------------------------------------------------------|------------------------------------------------------------------------------------------------------------------------------------------------------------------------------------------------------------------------------------------------------------------------|----------------------------------------------------------------------------------------------------------------------------------------------------------------------------------------------------------------------------------|----------------------------------------------------------------------------------------------------------------------------------------------------------------------------------|--------------------------------------------------------------------------------------------------------------------------------------------|---------------------------------------------------------------------------------------------------------------------------------|-----------------------------------------------------------------------------------------------------|-------------------------------------------------------------------------------------|----------------------------------------------------------------|-------------------------------------------------|
|                                                                                                                                                                                                                                                                            | 2)LiBH <sub>2</sub> BH                                                                                                                                                                                                                                   | 2)LiBH <sub>2</sub> B                                                                                                                                                                                                                                                  |                                                                                                                                                                                                                                  |                                                                                                                                                                                  |                                                                                                                                            |                                                                                                                                 |                                                                                                     |                                                                                     |                                                                |                                                 |
| LiNH <sub>2</sub> BH <sub>3</sub> .BH <sub>3</sub><br>(-H <sub>B</sub> =4.60)<br>LiNH <sub>2</sub> BH <sub>2</sub> .BH <sub>3</sub><br>LiNH <sub>2</sub> BH <sub>3</sub> .BH <sub>2</sub><br>(-H <sub>N</sub> =4.85)<br>LiNHBH <sub>3</sub> .BH <sub>3</sub>               | LiNH <sub>2</sub> BH <sub>2</sub> .BH <sub>3</sub><br>(-H <sub>N</sub> =2.53)<br>1) LiNHBH <sub>2</sub> .BH <sub>3</sub><br>(-H <sub>B</sub> =5.55)<br>2) LiNH <sub>2</sub> BH <sub>2</sub> .BH <sub>2</sub>                                             | LiNHBH <sub>2</sub> .BH <sub>3</sub><br>(-H <sub>B2</sub> =4.56)<br>1) LiNHBH <sub>2</sub> .BH <sub>2</sub><br>(-H <sub>N</sub> =4.94)<br>2)LiNBH <sub>2</sub> BH <sub>3</sub><br>(-H <sub>B1</sub> =4.66)<br>LiNHBH.BH <sub>3</sub>                                   | LiNHBH <sub>2</sub> .BH <sub>2</sub><br>(-H <sub>N</sub> =3.04)<br>LiNBH <sub>2</sub> .BH <sub>2</sub><br>(-H <sub>B1</sub> =4.38)<br>LiNHBH.BH <sub>2</sub>                                                                     | LiNBH <sub>2</sub> .BH <sub>2</sub><br>(-H <sub>B1</sub> =4.41)<br>1)LiNBH.BH <sub>2</sub>                                                                                       | LiNBH.BH <sub>2</sub><br>(-H <sub>B1</sub> =3.36)<br><br>(-H <sub>B2</sub> =5.34)<br>2) LiNBH.BH                                           | LiNBBH <sub>2</sub><br>(-H <sub>B2</sub> =4.33)<br>LiNBBH                                                                       | LiNBBH<br>(-H <sub>B2</sub> =3.21)                                                                  |                                                                                     |                                                                |                                                 |
| LiBH <sub>2</sub> NH <sub>3</sub> .BH <sub>3</sub><br>(-H <sub>B</sub> =3.71) (bridged H)<br>1)LiBH <sub>2</sub> NH <sub>3</sub> .BH <sub>2</sub><br>(-H <sub>N</sub> =5.18)<br>2)LiBH <sub>2</sub> NH <sub>2</sub> .BH <sub>3</sub>                                       | LiBH <sub>2</sub> NH <sub>3</sub> .BH <sub>2</sub><br>(-H <sub>N</sub> =5.12)<br>1)LiBH <sub>2</sub> NH <sub>2</sub> .BH <sub>2</sub><br>(-H <sub>B1,2</sub> =5.19)<br>2)LiBHNH <sub>3</sub> .BH <sub>2</sub><br>3)LiBH <sub>2</sub> NH <sub>3</sub> .BH | LiBH <sub>2</sub> NH <sub>2</sub> .BH <sub>2</sub><br>(-H <sub>B1</sub> =3.57)<br>1)LiBHNH <sub>2</sub> .BH <sub>2</sub><br>(-H <sub>N</sub> =4.58)<br>2) LiBH <sub>2</sub> NH.BH <sub>2</sub><br>(-H <sub>B2</sub> =4.49)<br>3) LiBH <sub>2</sub> NH <sub>2</sub> .BH | LiBHNH <sub>2</sub> .BH <sub>2</sub><br>(-H <sub>B2</sub> =4.66)<br>1) LiBHNH <sub>2</sub> .BH<br>(-H <sub>B1</sub> =5.01)<br>2) LiBNH <sub>2</sub> .BH <sub>2</sub><br><br>(-H <sub>N</sub> =3.51)<br>3) LiBHNH.BH <sub>2</sub> | LiBHNH.BH <sub>2</sub><br>(-H <sub>B1</sub> =4.50)<br>1)LiBNH.BH <sub>2</sub><br>(-H <sub>N</sub> =4.60)<br>2) LiBHN.BH <sub>2</sub><br>(-H <sub>B2</sub> =4.40)<br>3) LiBHNH.BH | LiBHNH.BH<br>(-H <sub>B1</sub> =3.14)<br>1)LiBNH.BH<br>(-H <sub>B2</sub> =5.41)<br>2)LiBHNH.B<br>(-H <sub>N</sub> =4.47)<br>LiBHN.BH       | LiBNH.BH<br>(-H <sub>N</sub> =3.84)<br>1)LiBNBH<br>(-H <sub>B2</sub> =4.69)<br>LiBNH.B                                          | LiBNBH<br>(-H <sub>B2</sub> =4.34)<br>LiBNB                                                         |                                                                                     |                                                                |                                                 |
| LiNH <sub>2</sub> BH <sub>3</sub> .NH <sub>3</sub> BH <sub>3</sub><br>(-H <sub>B2</sub> =4.43)1)<br>LiNH <sub>2</sub> BH <sub>2</sub> .NH <sub>3</sub> BH <sub>3</sub><br>(-H <sub>N2</sub> =5.18)<br>2)LiNH <sub>2</sub> BH <sub>3</sub> .NH <sub>2</sub> BH <sub>3</sub> | LiNH <sub>2</sub> BH <sub>2</sub> .NH <sub>3</sub> BH <sub>3</sub><br><sup>3</sup><br>(-H <sub>N2</sub> =2.34)<br>1)LiNH <sub>2</sub> BH <sub>2</sub> .NH <sub>2</sub><br>BH <sub>3</sub>                                                                | LiNH <sub>2</sub> BH <sub>2</sub> .NH <sub>2</sub> BH <sub>3</sub><br>(-H <sub>B1</sub> =4.58)<br>1)<br>LiNH <sub>2</sub> BH.NH <sub>2</sub> BH <sub>3</sub><br>(-H <sub>B2</sub> =4.60)                                                                               | LiNH <sub>2</sub> BH.NH <sub>2</sub> BH <sub>3</sub><br>(-H <sub>N2</sub> =2.99)<br>1)<br>LiNH <sub>2</sub> BH.NHBH <sub>3</sub><br>(-H <sub>B1</sub> =5.19)                                                                     | LiNH <sub>2</sub> BH.NHBH <sub>3</sub><br>(-H <sub>B2</sub> =4.46)<br>1)<br>LiNH <sub>2</sub> BH.NHBH <sub>2</sub><br>(-H <sub>N2</sub> =4.92)                                   | LiNH <sub>2</sub> BH.NHBH <sub>2</sub><br>(-H <sub>B1</sub> =4.19)<br>1) LiNH <sub>2</sub> B.NHBH <sub>2</sub><br>(-H <sub>N1</sub> =3.55) | LiNH <sub>2</sub> BHNBH <sub>2</sub><br>(-H <sub>B2</sub> =4.44)<br>1)LiNH <sub>2</sub> BHNBH<br>(-H <sub>B1</sub> =4.62)<br>2) | LiNH <sub>2</sub> BHNBH<br>(-H <sub>N1</sub> =4.54)<br>1)<br>LiNHBH.NBH<br>(-H <sub>B1</sub> =5.35) | LiNH <sub>2</sub> BH.NB<br>(-H <sub>B1</sub> =4.48)<br>1)<br>LiNH <sub>2</sub> B.NB | LiNH <sub>2</sub> B.NB<br>(-H <sub>N1</sub> =3.50)<br>LiNHB.NB | LiNHB.NB<br>(-H <sub>N1</sub> =5.46)<br>LiNB.NB |

|  |                                                                                                      |                                                                                                                                                                                                                                                    |                                                            |                                                                                                                                                                              |                                                                                                                                                          |                                                    |                                                                                 |                                           |  |  |
|--|------------------------------------------------------------------------------------------------------|----------------------------------------------------------------------------------------------------------------------------------------------------------------------------------------------------------------------------------------------------|------------------------------------------------------------|------------------------------------------------------------------------------------------------------------------------------------------------------------------------------|----------------------------------------------------------------------------------------------------------------------------------------------------------|----------------------------------------------------|---------------------------------------------------------------------------------|-------------------------------------------|--|--|
|  | (-H <sub>B2</sub> =5.07)<br>2)<br>LiNH <sub>2</sub> BH <sub>2</sub> .NH <sub>3</sub> BH <sub>2</sub> | 2)<br>LiNH <sub>2</sub> BH <sub>2</sub> .NH <sub>2</sub> BH <sub>2</sub><br>(-H <sub>N2</sub> =4.73)<br>3)LiNH <sub>2</sub> BH <sub>2</sub> .NHBH <sub>3</sub><br>(-H <sub>N1</sub> =4.72)<br>LiNHBH <sub>2</sub> .NH <sub>2</sub> BH <sub>3</sub> | 2)<br>LiNH <sub>2</sub> BH.NH <sub>2</sub> BH <sub>2</sub> | 2)LiNH <sub>2</sub> BH.NBH <sub>3</sub><br>(-H <sub>B1</sub> =4.78)<br>3)LiNH <sub>2</sub> BH.NBH <sub>3</sub><br>(-H <sub>N1</sub> =5.39)<br>4)<br>LiNHBH.NHBH <sub>3</sub> | 2)LiNHBH.NHBH <sub>2</sub><br>(-H <sub>B2</sub> =3.93)<br>LiNH <sub>2</sub> BHNHBH<br>(-H <sub>N2</sub> =2.76)<br>3)LiNH <sub>2</sub> BHNBH <sub>2</sub> | LiNHBHNBH <sub>2</sub><br>(-H <sub>N1</sub> =5.52) | 2)LiNH <sub>2</sub> BNBH<br>(-H <sub>B2</sub> =2.96)<br>LiNH <sub>2</sub> BH.NB | (-H <sub>N1</sub> =5.46)<br><br>LiNHBH.NB |  |  |
|--|------------------------------------------------------------------------------------------------------|----------------------------------------------------------------------------------------------------------------------------------------------------------------------------------------------------------------------------------------------------|------------------------------------------------------------|------------------------------------------------------------------------------------------------------------------------------------------------------------------------------|----------------------------------------------------------------------------------------------------------------------------------------------------------|----------------------------------------------------|---------------------------------------------------------------------------------|-------------------------------------------|--|--|

Table (S7): NBO Chart of all the molecules

| Series          | Compounds       | NBO Charges |   |    |
|-----------------|-----------------|-------------|---|----|
|                 |                 | N           | B | Li |
| NH <sub>3</sub> | NH <sub>3</sub> | -1.049      |   |    |
|                 | NH <sub>2</sub> | -0.553      |   |    |

|                                   |                                   |        |        |       |
|-----------------------------------|-----------------------------------|--------|--------|-------|
|                                   | NH                                | -0.215 |        |       |
|                                   | N                                 | 0.000  |        |       |
| BH <sub>3</sub>                   | BH <sub>3</sub>                   | 0.335  |        |       |
|                                   | BH <sub>2</sub>                   | 0.329  |        |       |
|                                   | BH                                | 0.356  |        |       |
|                                   | B                                 | 0.000  |        |       |
| NH <sub>3</sub> BH <sub>3</sub>   | NH <sub>3</sub> BH <sub>3</sub>   | -0.837 | -0.151 |       |
|                                   | NH <sub>2</sub> BH <sub>3</sub>   | -0.692 | -0.176 |       |
|                                   | NH <sub>2</sub> BH <sub>2</sub>   | -0.996 | 0.442  |       |
|                                   | NH <sub>2</sub> BH                | -1.089 | 0.458  |       |
|                                   | NHBH                              | -1.006 | 0.664  |       |
|                                   | BNH                               | -1.148 | 0.741  |       |
|                                   | BN                                | -0.853 | 0.853  |       |
| LiNH <sub>2</sub>                 | LiNH <sub>2</sub>                 | -1.559 |        | 0.886 |
|                                   | LiNH                              | -1.146 |        | 0.857 |
|                                   | LiN                               | -0.846 |        | 0.846 |
| LiBH <sub>2</sub>                 | LiBH <sub>2</sub>                 | -0.370 |        | 0.645 |
|                                   | LiBH                              | -0.458 |        | 0.671 |
|                                   | LiB                               |        | -0.366 | 0.366 |
| LiNH <sub>2</sub> BH <sub>3</sub> | LiNH <sub>2</sub> BH <sub>3</sub> | -1.139 | -0.189 | 0.837 |
|                                   | LiNH <sub>2</sub> BH <sub>2</sub> | -1.170 | 0.131  | 0.418 |
|                                   | LiNHBH <sub>2</sub>               | -1.227 | 0.280  | 0.849 |

|                                                    |                                                    |                                                  |        |       |
|----------------------------------------------------|----------------------------------------------------|--------------------------------------------------|--------|-------|
|                                                    | LiNHBH                                             | -1.321                                           | 0.325  | 0.718 |
|                                                    | LiNBH                                              | -1.402                                           | 0.559  | 0.934 |
|                                                    | LiNB                                               | -1.559                                           | 0.629  | 0.930 |
| LiBH <sub>2</sub> NH <sub>3</sub>                  | LiBH <sub>2</sub> NH <sub>3</sub>                  | -0.862                                           | -0.569 | 0.416 |
|                                                    | LiBH <sub>2</sub> NH <sub>2</sub>                  | -0.981                                           | 0.271  | 0.113 |
| LiNH <sub>2</sub> NH <sub>3</sub>                  | LiNH <sub>2</sub> NH <sub>3</sub>                  | N <sub>1</sub> =-1.507<br>N <sub>2</sub> =-1.085 |        | 0.794 |
|                                                    | LiNH <sub>2</sub> NH <sub>2</sub>                  | N <sub>1</sub> =N <sub>2</sub> =<br>-1.045       |        | 0.788 |
|                                                    | LiNHNH <sub>2</sub>                                | N <sub>1</sub> =-1.015<br>N <sub>2</sub> =-0.770 |        | 0.811 |
|                                                    | LiNHNH                                             | N <sub>1</sub> =-0.735<br>N <sub>2</sub> =-0.734 |        | 0.834 |
|                                                    | LiNNH                                              | N <sub>1</sub> =-0.470<br>N <sub>2</sub> =-0.560 |        | 0.753 |
|                                                    | LiNN                                               | N <sub>1</sub> =-0.355<br>N <sub>2</sub> =-0.354 |        | 0.709 |
| LiNH <sub>2</sub> BH <sub>3</sub> .NH <sub>3</sub> | LiNH <sub>2</sub> BH <sub>3</sub> .NH <sub>3</sub> | N <sub>1</sub> =-1.111<br>N <sub>2</sub> =-1.060 | -0.179 | 0.714 |
|                                                    | LiNH <sub>2</sub> BH <sub>2</sub> .NH <sub>3</sub> | N <sub>1</sub> =-1.141<br>N <sub>2</sub> =-1.101 | 0.053  | 0.481 |
|                                                    | LiNHBH <sub>2</sub> .NH <sub>3</sub>               | N <sub>1</sub> =-1.193                           | 0.281  | 0.738 |



|                                              |                                              |                                  |                                  |       |
|----------------------------------------------|----------------------------------------------|----------------------------------|----------------------------------|-------|
|                                              |                                              | $N_2 = -1.067$                   |                                  |       |
|                                              | $\text{LiNHBH}_3 \cdot \text{NH}_3$          | $N_1 = -1.274$<br>$N_2 = -1.078$ | 0.336                            | 0.630 |
|                                              | $\text{LiNBH}_3 \cdot \text{NH}_3$           | $N_1 = -1.327$<br>$N_2 = -1.091$ | 0.521                            | 0.849 |
|                                              | $\text{LiNB} \cdot \text{NH}_3$              | $N_1 = -1.486$<br>$N_2 = -1.092$ | 0.592                            | 0.843 |
|                                              | $\text{LiNB} \cdot \text{NH}_2$              | $N_1 = -0.909$<br>$N_2 = -0.691$ | 0.110                            | 0.760 |
|                                              | $\text{LiNB} \cdot \text{NH}$                | $N_1 = -0.748$<br>$N_2 = -0.523$ | 0.141                            | 0.793 |
|                                              | $\text{LiNBN}$                               | $N_1 = -0.638$<br>$N_2 = -0.229$ | 0.099                            | 0.768 |
| $\text{LiBH}_2\text{NH}_3 \cdot \text{NH}_3$ | $\text{LiBH}_2\text{NH}_3 \cdot \text{NH}_3$ | $N_1 = -0.863$<br>$N_2 = -1.096$ | -0.559                           | 0.404 |
|                                              | $\text{LiBH}_2\text{NH}_2 \cdot \text{NH}_3$ | $N_1 = -0.996$<br>$N_2 = -1.104$ | 0.142                            | 0.269 |
| $\text{LiBH}_2\text{BH}_3$                   | $\text{LiBH}_2\text{BH}_3$                   |                                  | $B_1 = -0.370$<br>$B_2 = -0.402$ | 0.838 |
|                                              | $\text{LiBH}_2\text{BH}_2$                   |                                  | $B_1 = -0.217$<br>$B_2 = -0.218$ | 0.811 |
|                                              | $\text{LiBH}_2\text{BH}$                     |                                  | $B_1 = -0.117$<br>$B_2 = -0.874$ | 0.826 |

|                                                    |                                                    |        |                                                  |       |
|----------------------------------------------------|----------------------------------------------------|--------|--------------------------------------------------|-------|
|                                                    | LiBHBH                                             |        | B <sub>1</sub> =-0.338<br>B <sub>2</sub> =-0.337 | 0.808 |
|                                                    | LiBBH                                              |        | B <sub>1</sub> =0.035<br>B <sub>2</sub> =-0.682  | 0.771 |
|                                                    | LiBB                                               |        | B <sub>1</sub> =-0.103<br>B <sub>2</sub> =-0.995 | 0.892 |
| LiNH <sub>2</sub> BH <sub>3</sub> .BH <sub>3</sub> | LiNH <sub>2</sub> BH <sub>3</sub> .BH <sub>3</sub> | -0.882 | B <sub>1</sub> =-0.172<br>B <sub>2</sub> =-0.172 | 0.783 |
|                                                    | LiNH <sub>2</sub> BH <sub>2</sub> .BH <sub>3</sub> | -0.931 | B <sub>1</sub> =-0.061<br>B <sub>2</sub> =-0.171 | 0.729 |
|                                                    | LiNHBH <sub>2</sub> .BH <sub>3</sub>               | -0.998 | B <sub>1</sub> =0.346<br>B <sub>2</sub> =-0.192  | 0.817 |
|                                                    | LiNHBH <sub>2</sub> .BH <sub>2</sub>               | -1.024 | B <sub>1</sub> =-0.091<br>B <sub>2</sub> =0.092  | 0.768 |
|                                                    | LiNBH <sub>2</sub> .BH <sub>2</sub>                | -1.155 | B <sub>1</sub> =0.290<br>B <sub>2</sub> =0.413   | 0.874 |
|                                                    | LiNBH.BH <sub>2</sub>                              | -1.142 | B <sub>1</sub> =0.338<br>B <sub>2</sub> =0.279   | 0.761 |
|                                                    | LiNB.BH <sub>2</sub>                               | -1.331 | B <sub>1</sub> =0.305<br>B <sub>2</sub> =0.474   | 0.771 |

|                                                                    |                                                                    |                                                  |                                                  |       |
|--------------------------------------------------------------------|--------------------------------------------------------------------|--------------------------------------------------|--------------------------------------------------|-------|
|                                                                    | LiNB.BH                                                            | -1.364                                           | B <sub>1</sub> =0.285<br>B <sub>2</sub> =0.480   | 0.675 |
|                                                                    | LiNBB                                                              | -1.449                                           | B <sub>1</sub> =0.380<br>B <sub>2</sub> =0.380   | 0.689 |
| LiBH <sub>2</sub> NH <sub>3</sub> .BH <sub>3</sub>                 | LiBH <sub>2</sub> NH <sub>3</sub> .BH <sub>3</sub>                 | -1.063                                           | B <sub>1</sub> =-0.387<br>B <sub>2</sub> =-0.388 | 0.741 |
|                                                                    | LiBH <sub>2</sub> NH <sub>3</sub> .BH <sub>2</sub>                 | -01.060                                          | B <sub>1</sub> =-0.206<br>B <sub>2</sub> =-0.206 | 0.682 |
|                                                                    | LiBH <sub>2</sub> NH <sub>2</sub> .BH <sub>2</sub>                 | -1.141                                           | B <sub>1</sub> =-0.063<br>B <sub>2</sub> =-0.538 | 0.837 |
|                                                                    | LiBHNH <sub>2</sub> .BH <sub>2</sub>                               | -1.130                                           | B <sub>1</sub> =0.144<br>B <sub>2</sub> =-0.322  | 0.799 |
|                                                                    | LiBHNH.BH <sub>2</sub>                                             | -1.146                                           | B <sub>1</sub> =-0.130<br>B <sub>2</sub> =0.158  | 0.840 |
|                                                                    | LiBHNH.BH                                                          | -1.128                                           | B <sub>1</sub> =0.044<br>B <sub>2</sub> =0.173   | 0.759 |
|                                                                    | LiBNH.BH                                                           | -1.136                                           | B <sub>1</sub> =0.226<br>B <sub>2</sub> =-0.164  | 0.786 |
| LiNH <sub>2</sub> BH <sub>3</sub> .NH <sub>3</sub> BH <sub>3</sub> | LiNH <sub>2</sub> BH <sub>3</sub> .NH <sub>3</sub> BH <sub>3</sub> | N <sub>1</sub> =-1.117<br>N <sub>2</sub> =-0.865 | B <sub>1</sub> =-0.165<br>B <sub>2</sub> =-0.176 | 0.728 |
|                                                                    | LiNH <sub>2</sub> BH <sub>2</sub> .NH <sub>3</sub> BH <sub>3</sub> | N <sub>1</sub> =-1.138                           | B <sub>1</sub> =-0.079                           | 0.678 |

|  |                                                         |                                  |                                 |       |
|--|---------------------------------------------------------|----------------------------------|---------------------------------|-------|
|  |                                                         | $N_2 = -0.900$                   | $B_2 = -0.185$                  |       |
|  | $\text{LiNH}_2\text{BH}_2 \cdot \text{NH}_2\text{BH}_3$ | $N_1 = -1.149$<br>$N_2 = -895$   | $B_1 = 0.245$<br>$B_2 = -0.167$ | 0.814 |
|  | $\text{LiNH}_2\text{BH} \cdot \text{NH}_2\text{BH}_3$   | $N_1 = -1.172$<br>$N_2 = -0.935$ | $B_1 = 0.236$<br>$B_2 = -0.175$ | 0.792 |
|  | $\text{LiNH}_2\text{BH} \cdot \text{NHBH}_3$            | $N_1 = -1.133$<br>$N_2 = -1.044$ | $B_1 = -0.176$<br>$B_2 = 0.698$ | 0.846 |
|  | $\text{LiNH}_2\text{BH} \cdot \text{NHBH}_2$            | $N_1 = -1.030$<br>$N_2 = -1.090$ | $B_1 = -0.023$<br>$B_2 = 0.631$ | 0.595 |
|  | $\text{LiNH}_2\text{BH} \cdot \text{NBH}_2$             | $N_1 = -1.246$<br>$N_2 = -1.038$ | $B_1 = 0.303$<br>$B_2 = 0.738$  | 0.859 |
|  | $\text{LiNH}_2\text{BH} \cdot \text{NBH}$               | $N_1 = -1.209$<br>$N_2 = -1.033$ | $B_1 = 0.331$<br>$B_2 = 0.630$  | 0.692 |
|  | $\text{LiNH}_2\text{BH} \cdot \text{NB}$                | $N_1 = -1.326$<br>$N_2 = -1.010$ | $B_1 = 0.255$<br>$B_2 = 0.694$  | 0.755 |

|  |                        |                                                  |                                                |       |
|--|------------------------|--------------------------------------------------|------------------------------------------------|-------|
|  | LiNH <sub>2</sub> B.NB | N <sub>1</sub> =-1.357<br>N <sub>2</sub> =-1.074 | B <sub>1</sub> =0.249<br>B <sub>2</sub> =0.753 | 0.648 |
|  | LiNHB.NB               | N <sub>1</sub> =-1.416<br>N <sub>2</sub> =-1.051 | B <sub>1</sub> =0.262<br>B <sub>2</sub> =0.970 | 0.830 |
|  | LiNB.NB                | N <sub>1</sub> =-1.369<br>N <sub>2</sub> =-0.602 | B <sub>1</sub> =0.336<br>B <sub>2</sub> =0.779 | 0.837 |
